# Supplementary material
Source: Springer Nature journal article supplement (https://www.springermedizin.de/resource/supplementary/12916_2005_53_MOESM1_ESM.pdf/9599066)

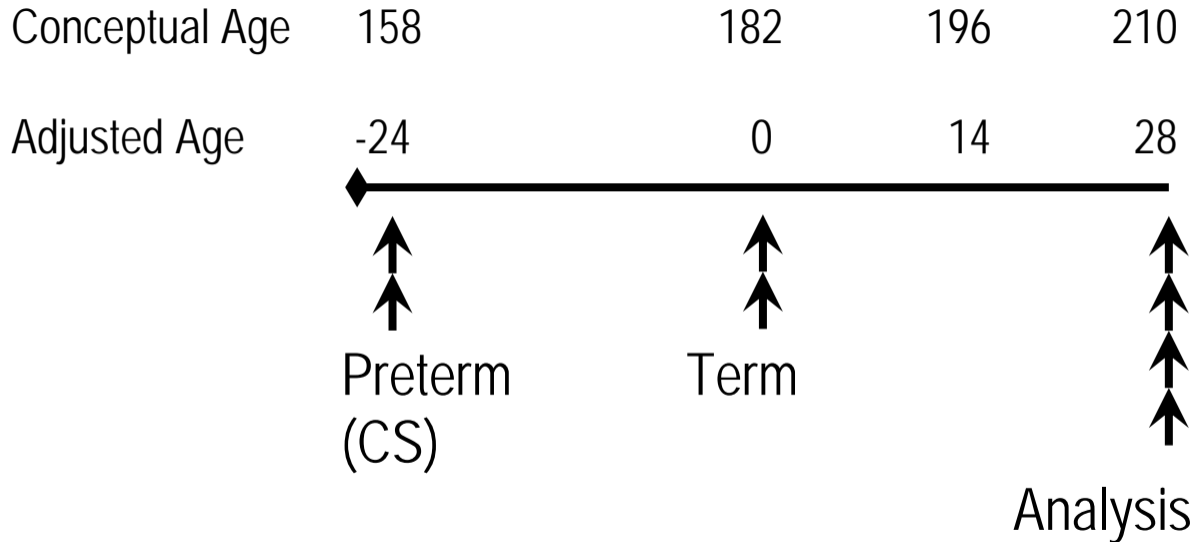

Supplement: MOESM1 [file 9599066]
